# Supplementary material
Source: ML conference proceedings conference paper supplement (https://openreview.net/forum?id=38dQv3OwN3)
Supplement: supplementary_material [file attachment]

---

# Fairness Aware Counterfactuals for Subgroups

## Supplemental Material

---

Anonymous Author(s)

Affiliation

Address

email

1 This is the appendix to the main paper, describing in detail the experimental setting (Section A),  
2 presenting the datasets (Section B), providing additional results and discussion (Section C), and  
3 quantitatively comparing the various fairness notions (Section D).

### 4 A Experimental Setting

5 **Models** To conduct our experiments, we have used the Logistic Regression<sup>1</sup> classification model,  
6 where we use the default implementation of the python package `scikit-learn`<sup>2</sup>. This model  
7 corresponds to the black box one that our framework audits in terms of fairness of recourse.

8 **Train-Test Split** For our experiments, all datasets are split into training and test sets with proportions  
9 70% and 30%, respectively. Both shuffling of the data and stratification based on the labels were  
10 employed. Our results can be reproduced using the random seed value 131313 in the data split  
11 function (`train_test_split`<sup>3</sup> from the python package `scikit-learn`). FACTS is deployed  
12 solely on the test set.

13 **Frequent Itemset Mining** The set of subgroups and the set of actions are generated by executing  
14 the `fp-growth`<sup>4</sup> algorithm for frequent itemset mining. We used the implementation in the Python  
15 package `mlxtend`<sup>5</sup>. We deploy `fp-growth` with support threshold **1%**, i.e., we require the return of  
16 subgroups and actions with at least 1% frequency in the respective populations. Recall that subgroups  
17 are derived from the affected populations  $D_0$  and  $D_1$  and actions are derived from the unaffected  
18 population.

19 **Effectiveness and Budgets** As we have stated in Section 2 our main paper, the metrics *Equal*  
20 *Choice for Recourse* and *Equal Cost of Effectiveness* require the definition of a target effectiveness  
21 level  $\phi$ , while the metric *Equal Effectiveness within Budget* requires the definition of a target cost  
22 level (or budget)  $c$ .

23 Regarding the metrics that require the definition of an effectiveness level  $\phi$ , we used two different val-  
24 ues arbitrarily, i.e., a relatively low effectiveness level of  $\phi = 30\%$  and a relatively high effectiveness  
25 level of  $\phi = 70\%$ .

26 For the estimation of budget-level values  $c$  we followed a more elaborate procedure. Specifically,

---

<sup>1</sup>[https://scikit-learn.org/stable/modules/generated/sklearn.linear\\_model.LogisticRegression.html](https://scikit-learn.org/stable/modules/generated/sklearn.linear_model.LogisticRegression.html)

<sup>2</sup><https://scikit-learn.org/stable/index.html>

<sup>3</sup>[https://scikit-learn.org/stable/modules/generated/sklearn.model\\_selection.train\\_test\\_split.html](https://scikit-learn.org/stable/modules/generated/sklearn.model_selection.train_test_split.html)

<sup>4</sup>[https://rasbt.github.io/mlxtend/user\\_guide/frequent\\_patterns/fpgrowth/](https://rasbt.github.io/mlxtend/user_guide/frequent_patterns/fpgrowth/)

<sup>5</sup><https://github.com/rasbt/mlxtend>

1. Compute the *Equal Cost of Effectiveness* (micro definition) with a target effectiveness level of  $\phi = 50\%$  to calculate, for all subgroups  $G$ , the minimum cost required to flip the prediction for at least 50% of both  $G_0$  and  $G_1$ .
2. Gather all such minimum costs of step 1 in an array.
3. Choose budget values as percentiles of this set of cost values. We have chosen the **30%**, **60%** and **90%** percentiles arbitrarily.

**Cost Functions** Our implementation allows the user to define any cost function based on their domain knowledge and requirements. For evaluation and demonstration purposes, we implement an indicative set of cost functions, according to which, the cost of a change of a feature value  $v$  to the value  $v'$  is defined as follows:

1. **Numerical features:**  $|norm(v) - norm(v')|$ , where  $norm$  is a function that normalizes values to  $[0, 1]$ .
2. **Categorical features:** 1 if  $v \neq v'$ , and 0 otherwise.
3. **Ordinal features:**  $|pos(v) - pos(v')|$ , where  $pos$  is a function that provides the order for each value.

Additionally to the above costs, the user is able to define a feature-specific weight that indicates the difficulty to change the given feature through an action. Thus, for each dataset, the cost of actions can be simply determined by specifying the numerical, categorical, and ordinal features, as well as the weights for each feature.

**Feasibility** Apart from the cost of actions, we also take care of some obvious unfeasible actions such as that the age and education features can not be reduced and actions should not lead to unknown or missing values.

**Compute resources** Experiments were run on commodity hardware (AMD Ryzen 5 5600H processor, 8GB RAM). On the software side, all experiments were run in an isolated conda environment using Python 3.9.16.

## B Datasets Description

We have used four datasets in our experimental evaluation; the main paper presented results only on the first. For each dataset, we provide details about the preprocessing procedure, specify feature types, and list the cost feature weights applied.

### B.1 Adult

We have generated CSCs in the Adult dataset<sup>6</sup> using two different features as protected attributes, i.e., ‘sex’, and ‘race’. The assessment of bias for each protected attribute is done separately. The results for ‘sex’ as the protected attribute are presented in the main paper. Before we present our results for race as the protected attribute, we briefly discuss the preprocessing procedures and feature weights used for the adult dataset.

**Preprocessing** We removed the features ‘fnlwgt’ and ‘education’ and any rows with unknown values. The ‘hours-per-week’ and ‘age’ features have been discretized into 5 bins each.

**Features** All features have been treated as categorical, except for ‘capital-gain’ and ‘capital-loss’, which are numeric, and ‘education-num’ and ‘hours-per-week’, which we treat as ordinal. The feature weights that we used for the cost function are presented in Table 2. We need to remind here that this comprises only an indicative weight assignment to serve our experimentation; the weight below try to capture the notion of how feasible/actionable it is to perform a change to a specific feature.

<sup>6</sup><https://raw.githubusercontent.com/columbia/fairtest/master/data/adult/adult.csv>

Table 2: Cost Feature Weights for Adult

| feature name   | weight value | feature name   | weight value |
|----------------|--------------|----------------|--------------|
| native-country | 4            | Workclass      | 2            |
| marital-status | 5            | hours-per-week | 2            |
| relationship   | 5            | capital-gain   | 1            |
| age            | 10           | capital-loss   | 1            |
| occupation     | 4            | education-num  | 3            |

## 69 B.2 COMPAS

70 We have generated CSCs in the COMPAS dataset<sup>7</sup> for race as the protected attribute. Apart from our  
 71 results, we provide some brief information regarding preprocessing procedures and the cost feature  
 72 weights for the COMPAS dataset.

73 **Preprocessing** We discard the features ‘age’ and ‘c\_charge\_desc’. The ‘priors\_count’ feature has  
 74 been discretized into 5 bins: [-0.1,1), [1, 5) [5, 10) [10, 15) and [15, 38), while trying to keep the  
 75 frequencies of each bin approximately equal (the distribution of values is highly asymmetric so this  
 76 is not possible with the direct use of e.g., `pandas.qcut`<sup>8</sup>).

77 **Features** We treat the features ‘juv\_fel\_count’, ‘juv\_misd\_count’, ‘juv\_other\_count’ as numerical  
 and the rest as categorical. The feature weights used for the cost function are shown in Table 3.

Table 3: Cost Feature Weights for COMPAS

| feature name    | weight value |
|-----------------|--------------|
| age_cat         | 10           |
| juv_fel_count   | 1            |
| juv_fel_count   | 1            |
| juv_other_count | 1            |
| priors_count    | 1            |
| c_charge_degree | 1            |

78

## 79 B.3 SSL

80 We have generated CSCs in the SSL dataset<sup>9</sup> for race as the protected attribute. Before we move  
 81 to our results, we discuss briefly preprocessing procedures and feature weights applied in the SSL  
 82 dataset.

83 **Preprocessing** We remove all rows with missing values (‘U’ or ‘X’) from the dataset. We also  
 84 discretize the feature ‘PREDICTOR RAT TREND IN CRIMINAL ACTIVITY’ into 6 bins. Finally,  
 85 since the target labels are values between 0 and 500, we ‘binarize’ them by assuming values above  
 86 344 to be positively impacted and below 345 negatively impacted (following the principles used in  
 87 <sup>10</sup>).

88 **Features** In this dataset, we treat all features as numerical (apart from the protected race feature).  
 89 The feature weights used for the cost function are presented in Table 4.

## 90 B.4 Ad Campaign

91 We have generated CSCs in the Ad Campaign dataset<sup>11</sup> for gender as the protected attribute.

<sup>7</sup>[https://aif360.readthedocs.io/en/latest/modules/generated/aif360.sklearn.datasets.fetch\\_compas.html](https://aif360.readthedocs.io/en/latest/modules/generated/aif360.sklearn.datasets.fetch_compas.html)

<sup>8</sup><https://pandas.pydata.org/pandas-docs/stable/reference/api/pandas.qcut.html>

<sup>9</sup><https://raw.githubusercontent.com/samuel-yeom/fliptest/master/exact-ot/chicago-ssl-clean.csv>

<sup>10</sup><https://arxiv.org/abs/1906.09218>

<sup>11</sup><https://developer.ibm.com/exchanges/data/all/bias-in-advertising/>

Table 4: Cost Feature Weights for SSL

| feature name                             | weight value |
|------------------------------------------|--------------|
| PREDICTOR RAT AGE AT LATEST ARREST       | 10           |
| PREDICTOR RAT VICTIM SHOOTING INCIDENTS  | 1            |
| PREDICTOR RAT VICTIM BATTERY OR ASSAULT  | 1            |
| PREDICTOR RAT ARRESTS VIOLENT OFFENSES   | 1            |
| PREDICTOR RAT GANG AFFILIATION           | 1            |
| PREDICTOR RAT NARCOTIC ARRESTS           | 1            |
| PREDICTOR RAT TREND IN CRIMINAL ACTIVITY | 1            |
| PREDICTOR RAT UOW ARRESTS                | 1            |

**Preprocessing** We decided not to remove missing values, since they represent the vast majority of values for all features. However, we did not allow actions that lead to missing values in the CSCs representation.

**Features** In this dataset, we treat all features, apart from the protected one, as categorical. The feature weights used for the cost function are shown in Table 5.

Table 5: Cost Feature Weights for Ad Campaign

| feature name     | weight value |
|------------------|--------------|
| religion         | 5            |
| politics         | 2            |
| parents          | 3            |
| age              | 10           |
| income           | 3            |
| area             | 2            |
| college_educated | 3            |
| homeowner        | 1            |

## C Additional Results

This section repeats the experiment described in the main paper, concerning the Adult dataset with ‘gender’ as the protected attribute (Section 4), to three other cases. Specifically, we provide three subgroups that were ranked first in terms of unfairness according to a metric, highlight why they were marked as unfair by our framework, and summarize their unfairness scores according to rest of the metrics.

### C.1 Results for Adult with race as the protected attribute

We showcase three prevalent subgroups for which the rankings assigned by different fairness definitions truly yield different kinds of information. This is showcased in Table 6. We once again note that the results presented here are for ‘race’ as a protected attribute, while the corresponding results for ‘gender’ are presented in Section 4 of the main paper.

Table 6: Example of three unfair subgroups in Adult (protected attribute race)

|                                                  | Subgroup 1 |              |                  | Subgroup 2 |              |                  | Subgroup 3 |              |                  |
|--------------------------------------------------|------------|--------------|------------------|------------|--------------|------------------|------------|--------------|------------------|
|                                                  | rank       | bias against | unfairness score | rank       | bias against | unfairness score | rank       | bias against | unfairness score |
| Equal Effectiveness                              | Fair       | Fair         | 0.0              | 3047.0     | Non-White    | 0.115            | 1682.0     | Non-White    | 0.162            |
| Equal Choice for Recourse ( $\phi = 0.3$ )       | 1          | Non-White    | 10.0             | 10.0       | Non-White    | 1.0              | Fair       | Fair         | 0.0              |
| Equal Choice for Recourse ( $\phi = 0.7$ )       | Fair       | Fair         | 0.0              | Fair       | Fair         | 0.0              | Fair       | Fair         | 0.0              |
| Equal Effectiveness within Budget ( $c = 1.15$ ) | Fair       | Fair         | 0.0              | Fair       | Fair         | 0.0              | Fair       | Fair         | 0.0              |
| Equal Effectiveness within Budget ( $c = 10.0$ ) | 303.0      | Non-White    | 0.242            | 2201.0     | Non-White    | 0.115            | 4035.0     | Non-White    | 0.071            |
| Equal Effectiveness within Budget ( $c = 21.0$ ) | Fair       | Fair         | 0.0              | 2978.0     | Non-White    | 0.115            | 1663.0     | Non-White    | 0.162            |
| Equal Cost of Effectiveness ( $\phi = 0.3$ )     | 18.0       | Non-White    | 0.15             | 1          | Non-White    | inf              | Fair       | Fair         | 0.0              |
| Equal Cost of Effectiveness ( $\phi = 0.7$ )     | Fair       | Fair         | 0.0              | Fair       | Fair         | 0.0              | Fair       | Fair         | 0.0              |
| Fair Effectiveness-Cost Trade-Off                | 909.0      | Non-White    | 0.242            | 4597.0     | Non-White    | 0.115            | 2644.0     | Non-White    | 0.162            |
| Equal (Conditional) Mean Recourse                | 5897.0     | White        | 0.021            | 5309.0     | White        | 0.047            | 1          | Non-White    | inf              |

In Figure 4 we present the Comparative Subgroup Counterfactual representation for the subgroups of Table 6 that corresponds to the fairness metric for which each subgroup presents the minimum rank.

These results are in line with the findings reported in the main paper (Section 4), on the same dataset (Adult), but on a different protected attribute (race instead of gender). Subgroups that are ranked first (highly unfair) with respect to a specific definition, are ranked much lower or even considered as fair according to most of the remaining definitions. This serves as an indication for the utility of the different fairness definitions, which is further strengthened by the diversity of the respective CSCs of Table 6. For example, the Subgroup 1 CSC (ranked first *Equal Choice for Recourse* ( $\phi = 0.3$ )), demonstrates unfairness by contradicting a plethora of actions for the “White” protected subgroup, as opposed to much less actions for the the “Non-White” protected subgroup. For Subgroup 2, a much more concise representation is provided, tied to the respective definition (*Equal Cost of Effectiveness* ( $\phi = 0.3$ )): no recourses are identified for the desired percentage of the “Non-White” unfavored population, as opposed to the “White” unfavored population.

## C.2 Results for COMPAS

We present some ranking statistics for three interesting subgroups for all fairness definitions (Table 7). The Comparative Subgroup Counterfactuals for the same three subgroups are shown in Figure 5.

Table 7: Example of three unfair subgroups in COMPAS

|                                                | Subgroup 1 |                  |                  | Subgroup 2 |                  |                  | Subgroup 3 |                  |                  |
|------------------------------------------------|------------|------------------|------------------|------------|------------------|------------------|------------|------------------|------------------|
|                                                | rank       | bias against     | unfairness score | rank       | bias against     | unfairness score | rank       | bias against     | unfairness score |
| Equal Effectiveness                            | Fair       | Fair             | 0.0              | 116.0      | African-American | 0.151            | 209.0      | African-American | 0.071            |
| Equal Choice for Recourse ( $\phi = 0.3$ )     | Fair       | Fair             | 0.0              | 3.0        | African-American | 1.0              | Fair       | Fair             | 0.0              |
| Equal Choice for Recourse ( $\phi = 0.7$ )     | 1          | African-American | 3.0              | Fair       | Fair             | 0.0              | Fair       | Fair             | 0.0              |
| Equal Effectiveness within Budget ( $c = 1$ )  | 66.0       | African-American | 0.167            | 79.0       | African-American | 0.151            | 185.0      | African-American | 0.071            |
| Equal Effectiveness within Budget ( $c = 10$ ) | 84.0       | African-American | 0.167            | 108.0      | African-American | 0.151            | 220.0      | African-American | 0.071            |
| Equal Cost of Effectiveness ( $\phi = 0.3$ )   | Fair       | Fair             | 0.0              | 1          | African-American | inf              | Fair       | Fair             | 0.0              |
| Equal Cost of Effectiveness ( $\phi = 0.7$ )   | Fair       | Fair             | 0.0              | Fair       | Fair             | 0.0              | Fair       | Fair             | 0.0              |
| Fair Effectiveness-Cost Trade-Off              | 3.0        | African-American | 0.5              | 214.0      | African-American | 0.151            | 376.0      | African-American | 0.071            |
| Equal (Conditional) Mean Recourse              | 59.0       | African-American | 1.667            | Fair       | Fair             | 0.0              | 1          | African-American | inf              |

## C.3 Results for SSL

In Table 8 we present a summary of the ranking statistics for three interesting subgroups. and their respective Comparative Subgroup Counterfactuals in Figure 6.

Table 8: Example of three unfair subgroups in SSL

|                                                | Subgroup 1 |              |                  | Subgroup 2 |              |                  | Subgroup 3 |              |                  |
|------------------------------------------------|------------|--------------|------------------|------------|--------------|------------------|------------|--------------|------------------|
|                                                | rank       | bias against | unfairness score | rank       | bias against | unfairness score | rank       | bias against | unfairness score |
| Equal Effectiveness                            | 1630.0     | Black        | 0.076            | 70.0       | Black        | 0.663            | 979.0      | Black        | 0.151            |
| Equal Choice for Recourse ( $\phi = 0.3$ )     | Fair       | Fair         | 0.0              | 12.0       | Black        | 1.0              | 12.0       | Black        | 1.0              |
| Equal Choice for Recourse ( $\phi = 0.7$ )     | 13.0       | Black        | 3.0              | Fair       | Fair         | 0.0              | Fair       | Fair         | 0.0              |
| Equal Effectiveness within Budget ( $c = 1$ )  | Fair       | Fair         | 0.0              | 195.0      | Black        | 0.663            | 1692.0     | White        | 0.138            |
| Equal Effectiveness within Budget ( $c = 2$ )  | 2427.0     | Black        | 0.111            | 126.0      | Black        | 0.663            | 3686.0     | White        | 0.043            |
| Equal Effectiveness within Budget ( $c = 10$ ) | 2557.0     | Black        | 0.076            | 73.0       | Black        | 0.663            | 1496.0     | Black        | 0.151            |
| Equal Cost of Effectiveness ( $\phi = 0.3$ )   | Fair       | Fair         | 0.0              | 1          | Black        | inf              | 1          | Black        | inf              |
| Equal Cost of Effectiveness ( $\phi = 0.7$ )   | 1          | Black        | inf              | Fair       | Fair         | 0.0              | Fair       | Fair         | 0.0              |
| Fair Effectiveness-Cost Trade-Off              | 3393.0     | Black        | 0.111            | 443.0      | Black        | 0.663            | 2685.0     | Black        | 0.151            |
| Equal (Conditional) Mean Recourse              | 3486.0     | Black        | 0.053            | 1          | Black        | inf              | 1374.0     | White        | 0.95             |

## C.4 Results for Ad Campaign

In Table 9 we present, as we did for the other datasets, the ranking results for 3 interesting subgroups, while in Figure 7, we show the respective Comparative Subgroup Counterfactuals for these subgroups.



|                                                                                                                                                                                                                                                                                                                                                                                                                                                                                                                                                                                                                                                                                                                                                                                                                                                                                                                                                                                                                                                                                                                                                                                                                                                                                                                                                                 |
|-----------------------------------------------------------------------------------------------------------------------------------------------------------------------------------------------------------------------------------------------------------------------------------------------------------------------------------------------------------------------------------------------------------------------------------------------------------------------------------------------------------------------------------------------------------------------------------------------------------------------------------------------------------------------------------------------------------------------------------------------------------------------------------------------------------------------------------------------------------------------------------------------------------------------------------------------------------------------------------------------------------------------------------------------------------------------------------------------------------------------------------------------------------------------------------------------------------------------------------------------------------------------------------------------------------------------------------------------------------------|
| <p><b>Subgroup 1</b></p> <p>If age_cat = 25 - 45, c_charge_degree = M, juv_misd_count = 0, priors_count = (10.0, 15.0]:</p> <p>Protected Subgroup = 'Caucasian', 1.03% covered</p> <p>Make c_charge_degree=F, priors_count=(-0.1, 1.0] with effectiveness 100.00%.</p> <p>Make priors_count=(-0.1, 1.0] with effectiveness 100.00%.</p> <p>Make priors_count=(1.0, 5.0] with effectiveness 100.00%.</p> <p>Make age_cat=Greater than 45, priors_count=(-0.1, 1.0] with effectiveness 100.00%.</p> <p>Make age_cat=Greater than 45, c_charge_degree=F, priors_count=(-0.1, 1.0] with effectiveness 100.00%.</p> <p>Make age_cat=Greater than 45, c_charge_degree=F, priors_count=(1.0, 5.0] with effectiveness 100.00%.</p> <p>Make age_cat=Greater than 45, priors_count=(1.0, 5.0] with effectiveness 100.00%.</p> <p>Protected Subgroup = 'African-American', 1.16% covered</p> <p>Make priors_count=(-0.1, 1.0] with effectiveness 83.33%.</p> <p>Make age_cat=Greater than 45, priors_count=(-0.1, 1.0] with effectiveness 100.00%.</p> <p>Make age_cat=Greater than 45, c_charge_degree=F, priors_count=(-0.1, 1.0] with effectiveness 100.00%.</p> <p>Make age_cat=Greater than 45, priors_count=(1.0, 5.0] with effectiveness 83.33%.</p> <p>Bias against African-American due to Equal Choice for Recourse (threshold = 0.7). Unfairness score = 3.</p> |
| <p><b>Subgroup 2</b></p> <p>If c_charge_degree = M, juv_other_count = 1:</p> <p>Protected Subgroup = 'Caucasian', 3.59% covered</p> <p>Make juv_other_count = 0 with effectiveness 42.86%.</p> <p>Protected Subgroup = 'African-American', 3.48% covered</p> <p>No recourses for this subgroup.</p> <p>Bias against African-American due to Equal Cost of Effectiveness (threshold = 0.3). Unfairness score = inf.</p>                                                                                                                                                                                                                                                                                                                                                                                                                                                                                                                                                                                                                                                                                                                                                                                                                                                                                                                                          |
| <p><b>Subgroup 3</b></p> <p>If age_cat = Greater than 45, c_charge_degree = F, juv_fel_count = 0, juv_misd_count = 0, juv_other_count = 0, sex = Male:</p> <p>Protected Subgroup = 'Caucasian', 7.18% covered</p> <p>Make c_charge_degree=M with effectiveness 7.14%.</p> <p>Protected Subgroup = 'African-American', 6.00% covered</p> <p>Make c_charge_degree=M with effectiveness 0.00%.</p> <p>Bias against African-American due to Equal Conditional Mean Recourse. Unfairness score = inf.</p>                                                                                                                                                                                                                                                                                                                                                                                                                                                                                                                                                                                                                                                                                                                                                                                                                                                            |

Figure 5: Example of three Comparative Subgroup Counterfactuals in COMPAS; ref. Table 7

|                                                                                                                                                                                                                                                                                                                                                                                                                                                                                                                                                                                                                                                                                                                                                                                                                                                                                                                                                                                                                                                                                                                                                                                                                                                                                                                                                                                                                                                                                                                                                                                                                                                                                                                                                                                                                                                                                                                                                                                                                                                                                                                                                                                                                                                                                                                                                                                                                                                                                                                                                                                                                                                                                                                                                                                                                                                                                                                                                                                                                                                                                                                                                                                                                                                                                                                                                                                                                                                                                                                                                                                                                                                                                                                                                                                                                                                                                                                                                                                                                                                                                                                                                                                                                                                                                                                                                                                                                                                                                                                                                                                                                                                                                                                                                                                                                                                                                                                                                                                                                                                                                                                           |
|---------------------------------------------------------------------------------------------------------------------------------------------------------------------------------------------------------------------------------------------------------------------------------------------------------------------------------------------------------------------------------------------------------------------------------------------------------------------------------------------------------------------------------------------------------------------------------------------------------------------------------------------------------------------------------------------------------------------------------------------------------------------------------------------------------------------------------------------------------------------------------------------------------------------------------------------------------------------------------------------------------------------------------------------------------------------------------------------------------------------------------------------------------------------------------------------------------------------------------------------------------------------------------------------------------------------------------------------------------------------------------------------------------------------------------------------------------------------------------------------------------------------------------------------------------------------------------------------------------------------------------------------------------------------------------------------------------------------------------------------------------------------------------------------------------------------------------------------------------------------------------------------------------------------------------------------------------------------------------------------------------------------------------------------------------------------------------------------------------------------------------------------------------------------------------------------------------------------------------------------------------------------------------------------------------------------------------------------------------------------------------------------------------------------------------------------------------------------------------------------------------------------------------------------------------------------------------------------------------------------------------------------------------------------------------------------------------------------------------------------------------------------------------------------------------------------------------------------------------------------------------------------------------------------------------------------------------------------------------------------------------------------------------------------------------------------------------------------------------------------------------------------------------------------------------------------------------------------------------------------------------------------------------------------------------------------------------------------------------------------------------------------------------------------------------------------------------------------------------------------------------------------------------------------------------------------------------------------------------------------------------------------------------------------------------------------------------------------------------------------------------------------------------------------------------------------------------------------------------------------------------------------------------------------------------------------------------------------------------------------------------------------------------------------------------------------------------------------------------------------------------------------------------------------------------------------------------------------------------------------------------------------------------------------------------------------------------------------------------------------------------------------------------------------------------------------------------------------------------------------------------------------------------------------------------------------------------------------------------------------------------------------------------------------------------------------------------------------------------------------------------------------------------------------------------------------------------------------------------------------------------------------------------------------------------------------------------------------------------------------------------------------------------------------------------------------------------------------------------------------------|
| <p><b>Subgroup 1</b><br/> If PREDICTOR RAT ARRESTS VIOLENT OFFENSES = 1, PREDICTOR RAT NARCOTIC ARRESTS = 1, PREDICTOR RAT VICTIM BATTERY OR ASSAULT = 1:<br/> Protected Subgroup = 'Black', 1.04% covered<br/> No recourses for this subgroup.<br/> Protected Subgroup = 'White', 1.00% covered<br/> Make PREDICTOR RAT ARRESTS VIOLENT OFFENSES = 0, PREDICTOR RAT NARCOTIC ARRESTS = 0, PREDICTOR RAT VICTIM BATTERY OR ASSAULT = 0 with effectiveness 72.73%<br/> Make PREDICTOR RAT ARRESTS VIOLENT OFFENSES = 0, PREDICTOR RAT NARCOTIC ARRESTS = 1, PREDICTOR RAT VICTIM BATTERY OR ASSAULT = 0 with effectiveness 72.73%<br/> Make PREDICTOR RAT ARRESTS VIOLENT OFFENSES = 0, PREDICTOR RAT NARCOTIC ARRESTS = 2, PREDICTOR RAT VICTIM BATTERY OR ASSAULT = 0 with effectiveness 72.73%<br/> Bias against 'Black' due to Equal Cost of Effectiveness (threshold = 0.7). Unfairness score = inf.</p>                                                                                                                                                                                                                                                                                                                                                                                                                                                                                                                                                                                                                                                                                                                                                                                                                                                                                                                                                                                                                                                                                                                                                                                                                                                                                                                                                                                                                                                                                                                                                                                                                                                                                                                                                                                                                                                                                                                                                                                                                                                                                                                                                                                                                                                                                                                                                                                                                                                                                                                                                                                                                                                                                                                                                                                                                                                                                                                                                                                                                                                                                                                                                                                                                                                                                                                                                                                                                                                                                                                                                                                                                                                                                                                                                                                                                                                                                                                                                                                                                                                                                                                                                                                                              |
| <p><b>Subgroup 2</b><br/> If PREDICTOR RAT NARCOTIC ARRESTS = 0, PREDICTOR RAT TREND IN CRIMINAL ACTIVITY = (-0.2, -0.1], PREDICTOR RAT UOW ARRESTS = 0, PREDICTOR RAT VICTIM SHOOTING INCIDENTS = 0:<br/> Protected Subgroup = 'Black', 2.51% covered<br/> Make PREDICTOR RAT NARCOTIC ARRESTS = 0, PREDICTOR RAT TREND IN CRIMINAL ACTIVITY = (-8.200999999999999, -0.3], PREDICTOR RAT UOW ARRESTS = 0, PREDICTOR RAT VICTIM SHOOTING INCIDENTS = 0 with effectiveness 0.00%<br/> Make PREDICTOR RAT NARCOTIC ARRESTS = 0, PREDICTOR RAT TREND IN CRIMINAL ACTIVITY = (-0.1, 0.1], PREDICTOR RAT UOW ARRESTS = 0, PREDICTOR RAT VICTIM SHOOTING INCIDENTS = 0 with effectiveness 0.00%<br/> Make PREDICTOR RAT NARCOTIC ARRESTS = 0, PREDICTOR RAT TREND IN CRIMINAL ACTIVITY = (0.1, 0.3], PREDICTOR RAT UOW ARRESTS = 0, PREDICTOR RAT VICTIM SHOOTING INCIDENTS = 0 with effectiveness 0.00%<br/> Make PREDICTOR RAT NARCOTIC ARRESTS = 1, PREDICTOR RAT TREND IN CRIMINAL ACTIVITY = (-8.200999999999999, -0.3], PREDICTOR RAT UOW ARRESTS = 0, PREDICTOR RAT VICTIM SHOOTING INCIDENTS = 0 with effectiveness 0.00%<br/> Make PREDICTOR RAT NARCOTIC ARRESTS = 0, PREDICTOR RAT TREND IN CRIMINAL ACTIVITY = (0.3, 7.3], PREDICTOR RAT UOW ARRESTS = 0, PREDICTOR RAT VICTIM SHOOTING INCIDENTS = 0 with effectiveness 0.00%<br/> Make PREDICTOR RAT NARCOTIC ARRESTS = 0, PREDICTOR RAT TREND IN CRIMINAL ACTIVITY = (-0.3, -0.2], PREDICTOR RAT UOW ARRESTS = 0, PREDICTOR RAT VICTIM SHOOTING INCIDENTS = 0 with effectiveness 0.00%<br/> Make PREDICTOR RAT NARCOTIC ARRESTS = 1, PREDICTOR RAT TREND IN CRIMINAL ACTIVITY = (-0.1, 0.1], PREDICTOR RAT UOW ARRESTS = 0, PREDICTOR RAT VICTIM SHOOTING INCIDENTS = 0 with effectiveness 0.00%<br/> Make PREDICTOR RAT NARCOTIC ARRESTS = 1, PREDICTOR RAT TREND IN CRIMINAL ACTIVITY = (-0.2, -0.1], PREDICTOR RAT UOW ARRESTS = 0, PREDICTOR RAT VICTIM SHOOTING INCIDENTS = 0 with effectiveness 0.00%<br/> Make PREDICTOR RAT NARCOTIC ARRESTS = 1, PREDICTOR RAT TREND IN CRIMINAL ACTIVITY = (0.1, 0.3], PREDICTOR RAT UOW ARRESTS = 0, PREDICTOR RAT VICTIM SHOOTING INCIDENTS = 0 with effectiveness 0.00%<br/> Make PREDICTOR RAT NARCOTIC ARRESTS = 2, PREDICTOR RAT TREND IN CRIMINAL ACTIVITY = (-8.200999999999999, -0.3], PREDICTOR RAT UOW ARRESTS = 0, PREDICTOR RAT VICTIM SHOOTING INCIDENTS = 0 with effectiveness 0.00%<br/> Make PREDICTOR RAT NARCOTIC ARRESTS = 1, PREDICTOR RAT TREND IN CRIMINAL ACTIVITY = (0.3, 7.3], PREDICTOR RAT UOW ARRESTS = 0, PREDICTOR RAT VICTIM SHOOTING INCIDENTS = 0 with effectiveness 0.00%<br/> Protected Subgroup = 'White', 2.87% covered<br/> Make PREDICTOR RAT NARCOTIC ARRESTS = 0, PREDICTOR RAT TREND IN CRIMINAL ACTIVITY = (-8.200999999999999, -0.3], PREDICTOR RAT UOW ARRESTS = 0, PREDICTOR RAT VICTIM SHOOTING INCIDENTS = 0 with effectiveness 57.14%<br/> Make PREDICTOR RAT NARCOTIC ARRESTS = 0, PREDICTOR RAT TREND IN CRIMINAL ACTIVITY = (-0.1, 0.1], PREDICTOR RAT UOW ARRESTS = 0, PREDICTOR RAT VICTIM SHOOTING INCIDENTS = 0 with effectiveness 0.00%<br/> Make PREDICTOR RAT NARCOTIC ARRESTS = 0, PREDICTOR RAT TREND IN CRIMINAL ACTIVITY = (0.1, 0.3], PREDICTOR RAT UOW ARRESTS = 0, PREDICTOR RAT VICTIM SHOOTING INCIDENTS = 0 with effectiveness 0.00%<br/> Make PREDICTOR RAT NARCOTIC ARRESTS = 1, PREDICTOR RAT TREND IN CRIMINAL ACTIVITY = (-8.200999999999999, -0.3], PREDICTOR RAT UOW ARRESTS = 0, PREDICTOR RAT VICTIM SHOOTING INCIDENTS = 0 with effectiveness 0.00%<br/> Make PREDICTOR RAT NARCOTIC ARRESTS = 0, PREDICTOR RAT TREND IN CRIMINAL ACTIVITY = (0.3, 7.3], PREDICTOR RAT UOW ARRESTS = 0, PREDICTOR RAT VICTIM SHOOTING INCIDENTS = 0 with effectiveness 0.00%<br/> Make PREDICTOR RAT NARCOTIC ARRESTS = 0, PREDICTOR RAT TREND IN CRIMINAL ACTIVITY = (-0.3, -0.2], PREDICTOR RAT UOW ARRESTS = 0, PREDICTOR RAT VICTIM SHOOTING INCIDENTS = 0 with effectiveness 0.00%<br/> Make PREDICTOR RAT NARCOTIC ARRESTS = 1, PREDICTOR RAT TREND IN CRIMINAL ACTIVITY = (-0.1, 0.1], PREDICTOR RAT UOW ARRESTS = 0, PREDICTOR RAT VICTIM SHOOTING INCIDENTS = 0 with effectiveness 0.00%<br/> Make PREDICTOR RAT NARCOTIC ARRESTS = 1, PREDICTOR RAT TREND IN CRIMINAL ACTIVITY = (-0.2, -0.1], PREDICTOR RAT UOW ARRESTS = 0, PREDICTOR RAT VICTIM SHOOTING INCIDENTS = 0 with effectiveness 0.00%<br/> Make PREDICTOR RAT NARCOTIC ARRESTS = 1, PREDICTOR RAT TREND IN CRIMINAL ACTIVITY = (0.1, 0.3], PREDICTOR RAT UOW ARRESTS = 0, PREDICTOR RAT VICTIM SHOOTING INCIDENTS = 0 with effectiveness 0.00%<br/> Make PREDICTOR RAT NARCOTIC ARRESTS = 2, PREDICTOR RAT TREND IN CRIMINAL ACTIVITY = (-8.200999999999999, -0.3], PREDICTOR RAT UOW ARRESTS = 0, PREDICTOR RAT VICTIM SHOOTING INCIDENTS = 0 with effectiveness 0.00%<br/> Make PREDICTOR RAT NARCOTIC ARRESTS = 1, PREDICTOR RAT TREND IN CRIMINAL ACTIVITY = (0.3, 7.3], PREDICTOR RAT UOW ARRESTS = 0, PREDICTOR RAT VICTIM SHOOTING INCIDENTS = 0 with effectiveness 0.00%<br/> Bias against 'Black' due to Equal(Conditional) Mean Recourse. Unfairness score = inf.</p> |
| <p><b>Subgroup 3</b><br/> If PREDICTOR RAT GANG AFFILIATION = 1, PREDICTOR RAT NARCOTIC ARRESTS = 2, PREDICTOR RAT TREND IN CRIMINAL ACTIVITY = (-8.200999999999999, -0.3], PREDICTOR RAT VICTIM SHOOTING INCIDENTS = 0:<br/> Protected Subgroup = 'Black', 1.18% covered<br/> No recourses for this subgroup.<br/> Protected Subgroup = 'White', 1.00% covered<br/> Make PREDICTOR RAT GANG AFFILIATION = 0, PREDICTOR RAT NARCOTIC ARRESTS = 0, PREDICTOR RAT TREND IN CRIMINAL ACTIVITY = (-8.200999999999999, -0.3], PREDICTOR RAT VICTIM SHOOTING INCIDENTS = 0 with effectiveness 31.82%<br/> Bias against 'Black' due to Equal Cost of Effectiveness (threshold = 0.3). Unfairness score = inf.</p>                                                                                                                                                                                                                                                                                                                                                                                                                                                                                                                                                                                                                                                                                                                                                                                                                                                                                                                                                                                                                                                                                                                                                                                                                                                                                                                                                                                                                                                                                                                                                                                                                                                                                                                                                                                                                                                                                                                                                                                                                                                                                                                                                                                                                                                                                                                                                                                                                                                                                                                                                                                                                                                                                                                                                                                                                                                                                                                                                                                                                                                                                                                                                                                                                                                                                                                                                                                                                                                                                                                                                                                                                                                                                                                                                                                                                                                                                                                                                                                                                                                                                                                                                                                                                                                                                                                                                                                                                |

Figure 6: Example of three Comparative Subgroup Counterfactuals in SSL; ref. Table 8



|                                                                                                                                                                                                                                                                                                                                                                                                                                                                                                                                                                                                                                                                                                                                                                                                                                                                                                                                                                                                                                                                                                                                                                                                                                                                                                                                                                                                                                                                                                                                                                                                                                                                                                                                                          |
|----------------------------------------------------------------------------------------------------------------------------------------------------------------------------------------------------------------------------------------------------------------------------------------------------------------------------------------------------------------------------------------------------------------------------------------------------------------------------------------------------------------------------------------------------------------------------------------------------------------------------------------------------------------------------------------------------------------------------------------------------------------------------------------------------------------------------------------------------------------------------------------------------------------------------------------------------------------------------------------------------------------------------------------------------------------------------------------------------------------------------------------------------------------------------------------------------------------------------------------------------------------------------------------------------------------------------------------------------------------------------------------------------------------------------------------------------------------------------------------------------------------------------------------------------------------------------------------------------------------------------------------------------------------------------------------------------------------------------------------------------------|
| <p><b>Subgroup 1</b></p> <p>If age = 45–54, area = Unknown, parents = 1:</p> <p>Protected Subgroup = 'Male', 1.22% covered</p> <p>Make age=55–64, area=Rural with effectiveness 30.77%.</p> <p>Protected Subgroup = 'Female', 1.13% covered</p> <p>No recourse for this subgroup.</p> <p>Bias against Female due to Equal Cost of Effectiveness (threshold=0.3). Unfairness score = inf.</p>                                                                                                                                                                                                                                                                                                                                                                                                                                                                                                                                                                                                                                                                                                                                                                                                                                                                                                                                                                                                                                                                                                                                                                                                                                                                                                                                                             |
| <p><b>Subgroup 2</b></p> <p>If age = 55–64, area = Unknown, homeowner = 1, income = Unknown, parents = 0, politics = Unknown, religion = Unknown:</p> <p>Protected Subgroup = 'Male', 2.53% covered</p> <p>Make homeowner=0, parents=1 with effectiveness 100.00%.</p> <p>Make homeowner=0, parents=1, religion=Christianity with effectiveness 100.00%.</p> <p>Make homeowner=0, parents=1, religion=Other with effectiveness 100.00%.</p> <p>Make area=Urban, parents=1, religion=Christianity with effectiveness 93.91%.</p> <p>Make area=Urban, parents=1, religion=Other with effectiveness 93.91%.</p> <p>Make homeowner=0, income=&lt;100K, parents=1 with effectiveness 100.00%.</p> <p>Make area=Rural, parents=1, religion=Other with effectiveness 100.00%.</p> <p>Make area=Rural, parents=1, religion=Christianity with effectiveness 100.00%.</p> <p>Make homeowner=0, income=&lt;100K, parents=1, religion=Christianity with effectiveness 100.00%.</p> <p>Make homeowner=0, income=&lt;100K, parents=1, religion=Other with effectiveness 100.00%.</p> <p>Protected Subgroup = 'Female', 2.33% covered</p> <p>Make homeowner=0, parents=1 with effectiveness 100.00%.</p> <p>Make homeowner=0, parents=1, religion=Christianity with effectiveness 100.00%.</p> <p>Make homeowner=0, parents=1, religion=Other with effectiveness 100.00%.</p> <p>Make homeowner=0, income=&lt;100K, parents=1 with effectiveness 100.00%.</p> <p>Make homeowner=0, income=&lt;100K, parents=1, religion=Christianity with effectiveness 100.00%.</p> <p>Make homeowner=0, income=&lt;100K, parents=1, religion=Other with effectiveness 100.00%.</p> <p>Bias against Female due to Equal Choice for Recourse (threshold=0.7). Unfairness score = 4.</p> |
| <p><b>Subgroup 3</b></p> <p>If ages = 55–64, income = &lt;100K, religion = Unknown:</p> <p>Protected Subgroup = 'Male', 1.02% covered</p> <p>Make religion=Christianity with effectiveness 0.00%.</p> <p>Make religion=Other with effectiveness 0.00%.</p> <p>Protected Subgroup = 'Female', 1.08% covered</p> <p>Make religion=Christianity with effectiveness 9.86%.</p> <p>Make religion=Other with effectiveness 9.86%.</p> <p>Bias against Male due to Equal Conditional Mean Recourse. Unfairness score = inf.</p>                                                                                                                                                                                                                                                                                                                                                                                                                                                                                                                                                                                                                                                                                                                                                                                                                                                                                                                                                                                                                                                                                                                                                                                                                                 |

Figure 7: Example of three Comparative Subgroup Counterfactuals in Ad Campaign; ref. Table 9

## D Comparison of Fairness Metrics

The goal of this section is to answer the question: “How different are the fairness of recourse metrics”. To answer it, we consider all subgroups and compare how they rank in terms of unfairness according to 12 distinct metrics. The results justify our claim in the main paper that the fairness metrics capture different aspects of recourse unfairness. For each dataset and protected attribute, we provide: (a) the ranking analysis table, and (b) the aggregated rankings table.

The first column of the *ranking analysis* table shows the number of the most unfair subgroups per metric, i.e., how many ties are in rank 1. Depending on the unit of the unfairness score being compared between the protected subgroups (namely: cost, effectiveness, or number of actions), the number of ties can vary greatly. Therefore, we expect to have virtually no ties when comparing effectiveness percentages and to have many ties when comparing costs. The second and third columns show the number of subgroups where we observe bias in one direction (e.g., against males) and the opposite (e.g., against females) among the top 10% most unfair subgroups.

The *aggregated rankings* table is used as evidence that different fairness metrics capture different types of recourse unfairness. Each row concerns the subgroups that are the most unfair (i.e., tied at rank 1) according to each fairness metric. The values in the row indicate the average percentile ranks of these subgroups (i.e., what percentage of subgroups are more unfair) when ranked according to the other fairness metrics, shown as columns. Concretely, the value  $v$  of each cell  $i, j$  of this table is computed as follows:

1. We collect all subgroups of the fairness metric appearing in row  $i$  that are ranked first (the most biased) due to this metric.
2. We compute the average ranking  $a$  of these subgroups in the fairness metric appearing in column  $j$ .
3. We divide  $a$  with the largest ranking tier of the fairness metric of column  $j$  to arrive at  $v$ .

Each non-diagonal value of this table represents the relative ranking based on the specific metric of the column for all the subgroups that are ranked first in the metric of the respective row (all diagonal values of this table are left empty). A relative ranking of  $v$  in a specific metric  $m$  means that the most unfair subgroups of another metric are ranked lower on average (thus are fairer) for metric  $m$ .

### D.1 Comparison on Adult for protected attribute gender

The number of affected individuals in the test set for the adult dataset is 10,205. We first split the affected individuals on the set of affected males  $D_1$  and the set of affected females  $D_0$ . The number of subgroups formed by running fp-growth with support threshold 1% on  $D_1$  and on  $D_0$  and computing their intersection is 12,880. Our fairness metrics will evaluate and rank these subgroups based on the actions applied.

Tables 10 and 11 present the ranking analysis and the aggregated rankings respectively on the gender attribute, on the Adult dataset. Next, we briefly discuss the findings from these two tables; similar findings stand for the respective tables of the other datasets, thus we omit the respective discussion.

It is evident from Table 10 that the different ways to produce ranking scores by different definitions can lead to considerable differences in ties, i.e., the number of subgroups receiving the same rank (here only rank 1 is depicted). The “Top 10%” columns demonstrate interesting statistics on the protected subgroup for which bias is identified: while it is expected that mostly bias against “Female” will be identified, subgroups with reverse bias (bias against “Male”) are identified, indicating robustness to gerrymandering, as hinted in Section 4 of the main paper.

Table 11 is produced to provide stronger evidence on the unique utility of the various presented definitions (see footnote 1 of the main paper: “Additional examples, as well as statistics measuring this pattern on a significantly larger sample, are included in the supplementary material to further support this finding.”). In particular, in this table, for all subgroups that are ranked first in a definition, we calculate their average relative (normalized in  $[0, 1]$ ) ranking in the remaining definitions. Given this, a value close to 1 means very low average rank and a value close to 0 means very high rank. Consequently, values away from 0 indicate the uniqueness and non-triviality of the different definitions and this becomes evident from the majority of the values of the table.

Table 10: Ranking Analysis in Adult (protected attribute gender)

|                                            | # Most Unfair Subgroups | # Subgroups w. Bias against Males (in Top 10% Unfair Subgroups) | # Subgroups w. Bias against Females (in Top 10% Unfair Subgroups) |
|--------------------------------------------|-------------------------|-----------------------------------------------------------------|-------------------------------------------------------------------|
| (Equal Cost of Effectiveness(Macro), 0.3)  | 1673                    | 56                                                              | 206                                                               |
| (Equal Cost of Effectiveness(Macro), 0.7)  | 301                     | 26                                                              | 37                                                                |
| (Equal Choice for Recourse, 0.3)           | 2                       | 54                                                              | 286                                                               |
| (Equal Choice for Recourse, 0.7)           | 6                       | 31                                                              | 50                                                                |
| Equal Effectiveness                        | 1                       | 39                                                              | 1040                                                              |
| (Equal Effectiveness within Budget, 5.0)   | 1                       | 41                                                              | 616                                                               |
| (Equal Effectiveness within Budget, 10.0)  | 1                       | 6                                                               | 904                                                               |
| (Equal Effectiveness within Budget, 18.0)  | 1                       | 22                                                              | 964                                                               |
| (Equal Cost of Effectiveness(Micro), 0.3)  | 1523                    | 10                                                              | 226                                                               |
| (Equal Cost of Effectiveness(Micro), 0.7)  | 290                     | 38                                                              | 27                                                                |
| Equal(Conditional Mean Recourse)           | 764                     | 540                                                             | 565                                                               |
| (Fair Effectiveness-Cost Trade-Off, value) | 1                       | 61                                                              | 1156                                                              |

Table 11: Aggregated Rankings in Adult (protected attribute gender)

|                                            | (Equal Cost of Effectiveness (Macro), 0.3) | (Equal Cost of Effectiveness (Macro), 0.7) | (Equal Choice for Recourse, 0.3) | (Equal Choice for Recourse, 0.7) | Equal Effectiveness | (Equal Effectiveness within Budget, 5.0) | (Equal Effectiveness within Budget, 10.0) | (Equal Effectiveness within Budget, 18.0) | (Equal Cost of Effectiveness (Micro), 0.3) | (Equal Cost of Effectiveness (Micro), 0.7) | Equal(Conditional Mean Recourse) | (Fair Effectiveness-Cost Trade-Off, value) |
|--------------------------------------------|--------------------------------------------|--------------------------------------------|----------------------------------|----------------------------------|---------------------|------------------------------------------|-------------------------------------------|-------------------------------------------|--------------------------------------------|--------------------------------------------|----------------------------------|--------------------------------------------|
| (Equal Cost of Effectiveness(Macro), 0.3)  | -                                          | 1.0                                        | 0.836                            | 1.0                              | 0.214               | 0.509                                    | 0.342                                     | 0.285                                     | 0.3                                        | 1.0                                        | 0.441                            | 0.237                                      |
| (Equal Cost of Effectiveness(Macro), 0.7)  | 0.634                                      | -                                          | 0.864                            | 0.686                            | 0.358               | 0.602                                    | 0.464                                     | 0.407                                     | 0.738                                      | 0.293                                      | 0.481                            | 0.307                                      |
| (Equal Choice for Recourse, 0.3)           | 0.018                                      | 1.0                                        | -                                | 1.0                              | 0.001               | 0.006                                    | 0.001                                     | 0.001                                     | 0.017                                      | 1.0                                        | 0.105                            | 0.001                                      |
| (Equal Choice for Recourse, 0.7)           | 1.0                                        | 0.364                                      | 0.857                            | -                                | 0.814               | 0.528                                    | 0.813                                     | 0.81                                      | 1.0                                        | 0.882                                      | 0.451                            | 0.34                                       |
| Equal Effectiveness                        | 0.018                                      | 1.0                                        | 0.214                            | 1.0                              | -                   | 0.003                                    | 0.0                                       | 0.0                                       | 0.017                                      | 1.0                                        | 0.058                            | 0.0                                        |
| (Equal Effectiveness within Budget, 5.0)   | 0.018                                      | 1.0                                        | 0.857                            | 1.0                              | 0.006               | -                                        | 0.004                                     | 0.006                                     | 0.017                                      | 1.0                                        | 1.0                              | 0.006                                      |
| (Equal Effectiveness within Budget, 10.0)  | 0.018                                      | 1.0                                        | 0.214                            | 1.0                              | 0.0                 | 0.002                                    | -                                         | 0.0                                       | 0.017                                      | 1.0                                        | 0.047                            | 0.0                                        |
| (Equal Effectiveness within Budget, 18.0)  | 0.018                                      | 1.0                                        | 0.214                            | 1.0                              | 0.0                 | 0.003                                    | 0.0                                       | -                                         | 0.017                                      | 1.0                                        | 0.058                            | 0.0                                        |
| (Equal Cost of Effectiveness(Micro), 0.3)  | 0.238                                      | 1.0                                        | 0.857                            | 1.0                              | 0.136               | 0.452                                    | 0.263                                     | 0.215                                     | -                                          | 1.0                                        | 0.462                            | 0.155                                      |
| (Equal Cost of Effectiveness(Micro), 0.7)  | 0.611                                      | 0.279                                      | 0.864                            | 0.771                            | 0.336               | 0.621                                    | 0.449                                     | 0.402                                     | 0.7                                        | -                                          | 0.465                            | 0.295                                      |
| Equal(Conditional Mean Recourse)           | 0.996                                      | 1.0                                        | 1.0                              | 1.0                              | 0.723               | 0.946                                    | 0.875                                     | 0.777                                     | 0.997                                      | 1.0                                        | -                                | 0.83                                       |
| (Fair Effectiveness-Cost Trade-Off, value) | 0.018                                      | 1.0                                        | 0.214                            | 1.0                              | 0.0                 | 0.002                                    | 0.0                                       | 0.0                                       | 0.017                                      | 1.0                                        | 0.047                            | -                                          |

## D.2 Comparison on Adult for protected attribute race

The number of affected individuals in the test set for the adult dataset is 10,205. We first split the affected individuals on the set of affected whites  $D_1$  and the set of affected non-whites  $D_0$ . The number of subgroups formed by running fp-growth with support threshold 1% on  $D_1$  and on  $D_0$  and computing their intersection is 16,621. Our fairness metrics will evaluate and rank these subgroups based on the actions applied.

Table 12: Ranking Analysis in Adult (protected attribute race)

|                                            | # Most Unfair Subgroups | # Subgroups w. Bias against Whites (in Top 10% Unfair Subgroups) | # Subgroups w. Bias against Non-Whites (in Top 10% Unfair Subgroups) |
|--------------------------------------------|-------------------------|------------------------------------------------------------------|----------------------------------------------------------------------|
| (Equal Cost of Effectiveness(Macro), 0.3)  | 1731                    | 0                                                                | 295                                                                  |
| (Equal Cost of Effectiveness(Macro), 0.7)  | 325                     | 7                                                                | 51                                                                   |
| (Equal Choice for Recourse, 0.3)           | 1                       | 2                                                                | 391                                                                  |
| (Equal Choice for Recourse, 0.7)           | 2                       | 10                                                               | 60                                                                   |
| Equal Effectiveness                        | 1                       | 6                                                                | 1433                                                                 |
| (Equal Effectiveness within Budget, 1.15)  | 1                       | 50                                                               | 24                                                                   |
| (Equal Effectiveness within Budget, 10.0)  | 1                       | 3                                                                | 1251                                                                 |
| (Equal Effectiveness within Budget, 21.0)  | 1                       | 0                                                                | 1423                                                                 |
| (Equal Cost of Effectiveness(Micro), 0.3)  | 1720                    | 0                                                                | 294                                                                  |
| (Equal Cost of Effectiveness(Micro), 0.7)  | 325                     | 7                                                                | 51                                                                   |
| Equal(Conditional Mean Recourse)           | 2545                    | 53                                                               | 1316                                                                 |
| (Fair Effectiveness-Cost Trade-Off, value) | 2                       | 0                                                                | 0                                                                    |

## D.3 Comparison on COMPAS

The number of affected individuals in the test set for the COMPAS dataset is 745. We first split the affected individuals on the set of affected caucasians  $D_1$  and the set of affected african-americans  $D_0$ . The number of subgroups formed by running fp-growth with support threshold 1% on  $D_1$  and on  $D_0$  and computing their intersection is 995. Our fairness metrics will evaluate and rank these subgroups based on the actions applied.

## D.4 Comparison on SSL

The number of affected individuals in the test set for the SSL dataset is 11,343. We first split the affected individuals on the set of affected blacks  $D_1$  and the set of affected whites  $D_0$  based on the race attribute (appears with the name RACE CODE CD in the dataset). The number of subgroups

Table 13: Aggregated Rankings in Adult (protected attribute race)

|                                            | (Equal Cost of Effectiveness (Macro), 0.3) | (Equal Cost of Effectiveness (Macro), 0.7) | (Equal Choice for Recourse, 0.3) | (Equal Choice for Recourse, 0.7) | Equal Effectiveness | (Equal Effectiveness within Budget, 1.15) | (Equal Effectiveness within Budget, 10.0) | (Equal Effectiveness within Budget, 21.0) | (Equal Cost of Effectiveness (Micro), 0.3) | (Equal Cost of Effectiveness (Micro), 0.7) | Equal(Conditional Mean Recourse) | (Fair Effectiveness-Cost Trade-Off, value) |
|--------------------------------------------|--------------------------------------------|--------------------------------------------|----------------------------------|----------------------------------|---------------------|-------------------------------------------|-------------------------------------------|-------------------------------------------|--------------------------------------------|--------------------------------------------|----------------------------------|--------------------------------------------|
| (Equal Cost of Effectiveness(Macro), 0.3)  | -                                          | 1.0                                        | 0.845                            | 1.0                              | 0.162               | 0.996                                     | 0.283                                     | 0.177                                     | 0.026                                      | 1.0                                        | 0.448                            | 0.194                                      |
| (Equal Cost of Effectiveness(Macro), 0.7)  | 0.7                                        | -                                          | 0.9                              | 0.829                            | 0.147               | 0.973                                     | 0.315                                     | 0.169                                     | 0.698                                      | 0.05                                       | 0.421                            | 0.12                                       |
| (Equal Choice for Recourse, 0.3)           | 0.419                                      | 1.0                                        | -                                | 1.0                              | 1.0                 | 0.03                                      | 1.0                                       | 0.419                                     | 1.0                                        | 0.782                                      | 0.073                            | 0.073                                      |
| (Equal Choice for Recourse, 0.7)           | 1.0                                        | 0.095                                      | 0.909                            | -                                | 0.644               | 1.0                                       | 0.003                                     | 0.328                                     | 1.0                                        | 0.1                                        | 0.041                            | 0.011                                      |
| Equal Effectiveness                        | 0.023                                      | 1.0                                        | 0.909                            | 1.0                              | -                   | 1.0                                       | 0.01                                      | 0.0                                       | 0.023                                      | 1.0                                        | 0.0                              | 0.0                                        |
| (Equal Effectiveness within Budget, 1.15)  | 1.0                                        | 0.048                                      | 1.0                              | 0.857                            | 0.069               | -                                         | 0.047                                     | 0.07                                      | 1.0                                        | 0.05                                       | 1.0                              | 0.102                                      |
| (Equal Effectiveness within Budget, 10.0)  | 0.395                                      | 0.048                                      | 0.818                            | 0.571                            | 0.001               | 1.0                                       | -                                         | 0.001                                     | 0.395                                      | 0.05                                       | 0.611                            | 0.002                                      |
| (Equal Effectiveness within Budget, 21.0)  | 0.023                                      | 1.0                                        | 0.909                            | 1.0                              | 0.0                 | 1.0                                       | 0.01                                      | -                                         | 0.023                                      | 1.0                                        | 0.0                              | 0.0                                        |
| (Equal Cost of Effectiveness(Micro), 0.3)  | 0.023                                      | 1.0                                        | 0.845                            | 1.0                              | 0.162               | 0.996                                     | 0.284                                     | 0.177                                     | -                                          | 1.0                                        | 0.449                            | 0.195                                      |
| (Equal Cost of Effectiveness(Micro), 0.7)  | 0.7                                        | 0.048                                      | 0.9                              | 0.829                            | 0.147               | 0.973                                     | 0.315                                     | 0.169                                     | 0.698                                      | -                                          | 0.421                            | 0.12                                       |
| Equal(Conditional Mean Recourse)           | 0.979                                      | 1.0                                        | 1.0                              | 1.0                              | 0.628               | 1.0                                       | 0.778                                     | 0.633                                     | 0.979                                      | 1.0                                        | -                                | 0.721                                      |
| (Fair Effectiveness-Cost Trade-Off, value) | 0.023                                      | 1.0                                        | 0.818                            | 1.0                              | 0.001               | 1.0                                       | 0.012                                     | 0.001                                     | 0.023                                      | 1.0                                        | 0.003                            | -                                          |

Table 14: Ranking Analysis in COMPAS

|                                            | # Most Unfair Subgroups | # Subgroups w. Bias against Caucasians (in Top 10% Unfair Subgroups) | # Subgroups w. Bias against African-Americans (in Top 10% Unfair Subgroups) |
|--------------------------------------------|-------------------------|----------------------------------------------------------------------|-----------------------------------------------------------------------------|
| (Equal Cost of Effectiveness(Macro), 0.3)  | 51                      | 0                                                                    | 11                                                                          |
| (Equal Cost of Effectiveness(Macro), 0.7)  | 46                      | 0                                                                    | 6                                                                           |
| (Equal Choice for Recourse, 0.3)           | 13                      | 12                                                                   | 8                                                                           |
| (Equal Choice for Recourse, 0.7)           | 15                      | 8                                                                    | 6                                                                           |
| Equal Effectiveness                        | 1                       | 14                                                                   | 37                                                                          |
| (Equal Effectiveness within Budget, 1.0)   | 4                       | 16                                                                   | 30                                                                          |
| (Equal Effectiveness within Budget, 10.0)  | 1                       | 20                                                                   | 39                                                                          |
| (Equal Cost of Effectiveness(Micro), 0.3)  | 51                      | 0                                                                    | 11                                                                          |
| (Equal Cost of Effectiveness(Micro), 0.7)  | 46                      | 0                                                                    | 6                                                                           |
| Equal(Conditional Mean Recourse)           | 37                      | 19                                                                   | 24                                                                          |
| (Fair Effectiveness-Cost Trade-Off, value) | 5                       | 18                                                                   | 62                                                                          |

197 formed by running fp-growth with support threshold 1% on  $D_1$  and on  $D_0$  and computing their  
198 intersection is 6,551. Our fairness metrics will evaluate and rank these subgroups based on the actions  
199 applied.

## 200 D.5 Comparison on Ad Campaign

201 The number of affected individuals in the test set for the Ad campaign dataset is 273,773. We first  
202 split the affected individuals on the set of affected males  $D_1$  and the set of affected females  $D_0$   
203 based on the gender attribute. The number of subgroups formed by running fp-growth with support  
204 threshold 1% on  $D_1$  and on  $D_0$  and computing their intersection is 1,432. Our fairness metrics will  
205 evaluate and rank these subgroups based on the actions applied.

Table 15: Aggregated Rankings in COMPAS

|                                            | (Equal Cost of Effectiveness (Macro), 0.3) | (Equal Cost of Effectiveness (Macro), 0.7) | (Equal Choice for Recourse, 0.3) | (Equal Choice for Recourse, 0.7) | Equal Effectiveness | (Equal Effectiveness within Budget, 1.0) | (Equal Effectiveness within Budget, 10.0) | (Equal Cost of Effectiveness (Micro), 0.3) | (Equal Cost of Effectiveness (Micro), 0.7) | Equal(Conditional Mean Recourse) | (Fair Effectiveness-Cost Trade-Off, value) |
|--------------------------------------------|--------------------------------------------|--------------------------------------------|----------------------------------|----------------------------------|---------------------|------------------------------------------|-------------------------------------------|--------------------------------------------|--------------------------------------------|----------------------------------|--------------------------------------------|
| (Equal Cost of Effectiveness(Macro), 0.3)  | -                                          | 1.0                                        | 0.65                             | 1.0                              | 0.169               | 0.801                                    | 0.398                                     | 0.2                                        | 1.0                                        | 0.797                            | 0.226                                      |
| (Equal Cost of Effectiveness(Macro), 0.7)  | 0.96                                       | -                                          | 0.925                            | 0.625                            | 0.127               | 0.518                                    | 0.236                                     | 0.96                                       | 0.2                                        | 0.52                             | 0.149                                      |
| (Equal Choice for Recourse, 0.3)           | 0.32                                       | 0.76                                       | -                                | 0.775                            | 0.082               | 1.0                                      | 0.178                                     | 0.32                                       | 0.76                                       | 0.297                            | 0.116                                      |
| (Equal Choice for Recourse, 0.7)           | 0.9                                        | 0.46                                       | 0.8                              | -                                | 0.424               | 0.484                                    | 0.057                                     | 0.9                                        | 0.46                                       | 0.259                            | 0.045                                      |
| Equal Effectiveness                        | 0.2                                        | 1.0                                        | 0.75                             | 1.0                              | -                   | 1.0                                      | 0.003                                     | 0.2                                        | 1.0                                        | 0.003                            | 0.002                                      |
| (Equal Effectiveness within Budget, 1.0)   | 0.8                                        | 1.0                                        | 0.75                             | 0.75                             | 1.0                 | -                                        | 1.0                                       | 0.8                                        | 1.0                                        | 0.413                            | 0.002                                      |
| (Equal Effectiveness within Budget, 10.0)  | 0.2                                        | 1.0                                        | 0.75                             | 1.0                              | 0.003               | 1.0                                      | -                                         | 0.2                                        | 1.0                                        | 0.003                            | 0.002                                      |
| (Equal Cost of Effectiveness(Micro), 0.3)  | 0.2                                        | 1.0                                        | 0.65                             | 1.0                              | 0.169               | 0.801                                    | 0.398                                     | -                                          | 1.0                                        | 0.797                            | 0.226                                      |
| (Equal Cost of Effectiveness(Micro), 0.7)  | 0.96                                       | 0.2                                        | 0.925                            | 0.625                            | 0.127               | 0.518                                    | 0.236                                     | 0.96                                       | -                                          | 0.52                             | 0.149                                      |
| Equal(Conditional) Mean Recourse           | 0.98                                       | 1.0                                        | 1.0                              | 1.0                              | 0.507               | 0.772                                    | 0.312                                     | 0.98                                       | 1.0                                        | -                                | 0.627                                      |
| (Fair Effectiveness-Cost Trade-Off, value) | 0.68                                       | 1.0                                        | 0.75                             | 0.8                              | 0.801               | 0.202                                    | 0.801                                     | 0.68                                       | 1.0                                        | 0.331                            | -                                          |

Table 16: Ranking Analysis in SSL

|                                            | # Most Unfair Subgroups | # Subgroups w. Bias against Whites (in Top 10% Unfair Subgroups) | # Subgroups w. Bias against Blacks (in Top 10% Unfair Subgroups) |
|--------------------------------------------|-------------------------|------------------------------------------------------------------|------------------------------------------------------------------|
| (Equal Cost of Effectiveness(Macro), 0.3)  | 371                     | 10                                                               | 107                                                              |
| (Equal Cost of Effectiveness(Macro), 0.7)  | 627                     | 26                                                               | 124                                                              |
| (Equal Choice for Recourse, 0.3)           | 1                       | 108                                                              | 184                                                              |
| (Equal Choice for Recourse, 0.7)           | 16                      | 78                                                               | 229                                                              |
| Equal Effectiveness                        | 1                       | 15                                                               | 389                                                              |
| (Equal Effectiveness within Budget, 1.0)   | 18                      | 18                                                               | 436                                                              |
| (Equal Effectiveness within Budget, 2.0)   | 2                       | 19                                                               | 532                                                              |
| (Equal Effectiveness within Budget, 10.0)  | 1                       | 15                                                               | 548                                                              |
| (Equal Cost of Effectiveness(Micro), 0.3)  | 458                     | 5                                                                | 135                                                              |
| (Equal Cost of Effectiveness(Micro), 0.7)  | 671                     | 23                                                               | 130                                                              |
| Equal(Conditional) Mean Recourse           | 100                     | 41                                                               | 434                                                              |
| (Fair Effectiveness-Cost Trade-Off, value) | 80                      | 76                                                               | 544                                                              |

Table 17: Aggregated Rankings in SSL

|                                            | (Equal Cost of Effectiveness (Macro), 0.3) | (Equal Cost of Effectiveness (Macro), 0.7) | (Equal Choice for Recourse, 0.3) | (Equal Choice for Recourse, 0.7) | Equal Effectiveness | (Equal Effectiveness within Budget, 1.0) | (Equal Effectiveness within Budget, 2.0) | (Equal Effectiveness within Budget, 10.0) | (Equal Cost of Effectiveness (Micro), 0.3) | (Equal Cost of Effectiveness (Micro), 0.7) | Equal(Conditional Mean Recourse) | (Fair Effectiveness-Cost Trade-Off, value) |
|--------------------------------------------|--------------------------------------------|--------------------------------------------|----------------------------------|----------------------------------|---------------------|------------------------------------------|------------------------------------------|-------------------------------------------|--------------------------------------------|--------------------------------------------|----------------------------------|--------------------------------------------|
| (Equal Cost of Effectiveness(Macro), 0.3)  | -                                          | 0.883                                      | 0.854                            | 0.988                            | 0.216               | 0.401                                    | 0.285                                    | 0.238                                     | 0.3                                        | 0.843                                      | 0.678                            | 0.338                                      |
| (Equal Cost of Effectiveness(Macro), 0.7)  | 0.929                                      | -                                          | 0.877                            | 0.725                            | 0.239               | 0.421                                    | 0.332                                    | 0.264                                     | 0.871                                      | 0.314                                      | 0.829                            | 0.342                                      |
| (Equal Choice for Recourse, 0.3)           | 0.143                                      | 1.0                                        | -                                | 1.0                              | 0.328               | 0.704                                    | 0.464                                    | 0.368                                     | 0.143                                      | 1.0                                        | 0.727                            | 0.601                                      |
| (Equal Choice for Recourse, 0.7)           | 1.0                                        | 0.167                                      | 0.769                            | -                                | 0.083               | 0.177                                    | 0.127                                    | 0.086                                     | 1.0                                        | 0.143                                      | 0.926                            | 0.135                                      |
| Equal Effectiveness                        | 0.143                                      | 0.167                                      | 0.923                            | 0.938                            | -                   | 0.002                                    | 0.0                                      | 0.0                                       | 0.143                                      | 0.143                                      | 0.0                              | 0.003                                      |
| (Equal Effectiveness within Budget, 1.0)   | 0.857                                      | 0.833                                      | 0.854                            | 0.881                            | 0.89                | -                                        | 0.923                                    | 0.876                                     | 0.857                                      | 0.857                                      | 0.327                            | 0.0                                        |
| (Equal Effectiveness within Budget, 2.0)   | 0.286                                      | 0.333                                      | 0.923                            | 0.938                            | 0.5                 | 0.002                                    | -                                        | 0.5                                       | 0.286                                      | 0.286                                      | 0.0                              | 0.003                                      |
| (Equal Effectiveness within Budget, 10.0)  | 0.143                                      | 0.167                                      | 0.923                            | 0.938                            | 0.0                 | 0.002                                    | 0.0                                      | -                                         | 0.143                                      | 0.143                                      | 0.0                              | 0.003                                      |
| (Equal Cost of Effectiveness(Micro), 0.3)  | 0.443                                      | 0.833                                      | 0.877                            | 0.969                            | 0.143               | 0.312                                    | 0.198                                    | 0.154                                     | -                                          | 0.843                                      | 0.729                            | 0.268                                      |
| (Equal Cost of Effectiveness(Micro), 0.7)  | 0.9                                        | 0.383                                      | 0.892                            | 0.788                            | 0.203               | 0.406                                    | 0.299                                    | 0.225                                     | 0.886                                      | -                                          | 0.816                            | 0.327                                      |
| Equal(Conditional) Mean Recourse           | 0.6                                        | 0.733                                      | 0.946                            | 0.969                            | 0.244               | 0.464                                    | 0.395                                    | 0.378                                     | 0.514                                      | 0.729                                      | -                                | 0.396                                      |
| (Fair Effectiveness-Cost Trade-Off, value) | 0.971                                      | 0.967                                      | 0.838                            | 0.869                            | 0.967               | 0.774                                    | 0.977                                    | 0.96                                      | 0.971                                      | 0.971                                      | 0.837                            | -                                          |

Table 18: Ranking Analysis in Ad Campaign

|                                            | # Most Unfair Subgroups | # Subgroups w. Bias against Males (in Top 10% Unfair Subgroups) | # Subgroups w. Bias against Females (in Top 10% Unfair Subgroups) |
|--------------------------------------------|-------------------------|-----------------------------------------------------------------|-------------------------------------------------------------------|
| (Equal Cost of Effectiveness(Macro), 0.3)  | 427                     | 0                                                               | 44                                                                |
| (Equal Cost of Effectiveness(Macro), 0.7)  | 264                     | 0                                                               | 26                                                                |
| (Equal Choice for Recourse, 0.3)           | 2                       | 10                                                              | 66                                                                |
| (Equal Choice for Recourse, 0.7)           | 384                     | 0                                                               | 39                                                                |
| Equal Effectiveness                        | 15                      | 0                                                               | 123                                                               |
| (Equal Effectiveness within Budget, 1.0)   | 1                       | 0                                                               | 42                                                                |
| (Equal Effectiveness within Budget, 5.0)   | 10                      | 0                                                               | 114                                                               |
| (Equal Cost of Effectiveness(Micro), 0.3)  | 427                     | 0                                                               | 44                                                                |
| (Equal Cost of Effectiveness(Micro), 0.7)  | 264                     | 0                                                               | 26                                                                |
| Equal(Conditional) Mean Recourse           | 108                     | 9                                                               | 74                                                                |
| (Fair Effectiveness-Cost Trade-Off, value) | 15                      | 0                                                               | 128                                                               |

Table 19: Aggregated Rankings in Ad Campaign

|                                            | (Equal Cost of Effectiveness (Macro), 0.3) | (Equal Cost of Effectiveness (Macro), 0.7) | (Equal Choice for Recourse, 0.3) | (Equal Choice for Recourse, 0.7) | Equal Effectiveness | (Equal Effectiveness within Budget, 1.0) | (Equal Effectiveness within Budget, 5.0) | (Equal Cost of Effectiveness (Micro), 0.3) | (Equal Cost of Effectiveness (Micro), 0.7) | Equal(Conditional Mean Recourse) | (Fair Effectiveness-Cost Trade-Off, value) |
|--------------------------------------------|--------------------------------------------|--------------------------------------------|----------------------------------|----------------------------------|---------------------|------------------------------------------|------------------------------------------|--------------------------------------------|--------------------------------------------|----------------------------------|--------------------------------------------|
| (Equal Cost of Effectiveness(Macro), 0.3)  | -                                          | 0.7                                        | 0.483                            | 0.6                              | 0.167               | 1.0                                      | 0.276                                    | 0.25                                       | 0.7                                        | 0.487                            | 0.154                                      |
| (Equal Cost of Effectiveness(Macro), 0.7)  | 0.25                                       | -                                          | 0.35                             | 0.333                            | 0.082               | 1.0                                      | 0.21                                     | 0.25                                       | 0.5                                        | 0.506                            | 0.079                                      |
| (Equal Choice for Recourse, 0.3)           | 0.25                                       | 1.0                                        | -                                | 1.0                              | 0.73                | 1.0                                      | 1.0                                      | 0.25                                       | 1.0                                        | 0.037                            | 0.338                                      |
| (Equal Choice for Recourse, 0.7)           | 0.5                                        | 0.65                                       | 0.333                            | -                                | 0.296               | 0.851                                    | 0.385                                    | 0.5                                        | 0.65                                       | 0.566                            | 0.273                                      |
| Equal Effectiveness                        | 0.25                                       | 0.5                                        | 0.333                            | 0.333                            | -                   | 1.0                                      | 0.205                                    | 0.25                                       | 0.5                                        | 0.002                            | 0.001                                      |
| (Equal Effectiveness within Budget, 1.0)   | 1.0                                        | 1.0                                        | 1.0                              | 1.0                              | 0.714               | -                                        | 0.671                                    | 1.0                                        | 1.0                                        | 0.305                            | 0.395                                      |
| (Equal Effectiveness within Budget, 5.0)   | 0.25                                       | 0.5                                        | 0.333                            | 0.333                            | 0.001               | 1.0                                      | -                                        | 0.25                                       | 0.5                                        | 0.002                            | 0.001                                      |
| (Equal Cost of Effectiveness(Micro), 0.3)  | 0.25                                       | 0.7                                        | 0.483                            | 0.6                              | 0.167               | 1.0                                      | 0.276                                    | -                                          | 0.7                                        | 0.487                            | 0.154                                      |
| (Equal Cost of Effectiveness(Micro), 0.7)  | 0.25                                       | 0.5                                        | 0.35                             | 0.333                            | 0.082               | 1.0                                      | 0.21                                     | 0.25                                       | -                                          | 0.506                            | 0.079                                      |
| Equal(Conditional) Mean Recourse           | 0.525                                      | 0.75                                       | 0.65                             | 0.7                              | 0.25                | 1.0                                      | 0.408                                    | 0.525                                      | 0.75                                       | -                                | 0.267                                      |
| (Fair Effectiveness-Cost Trade-Off, value) | 0.25                                       | 0.5                                        | 0.333                            | 0.333                            | 0.001               | 1.0                                      | 0.205                                    | 0.25                                       | 0.5                                        | 0.002                            | -                                          |
